# Supplementary material for: Phase 1 study of epacadostat in combination with atezolizumab for patients with previously treated advanced nonsmall cell lung cancer
Source: PubMed Central journal article supplement — Int J Cancer. 2020 Mar 20;147(7):1963–9. doi: 10.1002/ijc.32951 (PMC7496129; doi:10.1002/ijc.32951), 2020-03-20
Supplement: IJC-147-1963-s001.pdf [file IJC-147-1963-s001.pdf]

***Supplementary Material***

**Phase 1 Study of Epcadostat in Combination With Atezolizumab for Patients With Previously Treated Advanced Non-Small Cell Lung Cancer**

**Authors:** Matthew D. Hellmann, Scott Gettinger, Laura Q. M. Chow, Michael Gordon, Mark M. Awad, Edward Cha, Xiaohua Gong, Gongfu Zhou, Chris Walker, Lance Leopold, Rebecca S. Heist

**Table of Contents:** Supplementary Table 1 – pg. 2

**Supplementary Table 1. Epacadostat pharmacokinetics at steady state**

| Epacadostat Dose        | n | C <sub>max</sub> , μM     | C <sub>min</sub> , μM       | T <sub>max</sub> , h | AUC <sub>0-12h</sub> , h•μM | CL/F, L/h             |
|-------------------------|---|---------------------------|-----------------------------|----------------------|-----------------------------|-----------------------|
| 25 mg BID               | 3 | 0.211 ± 0.0749<br>(0.201) | 0.0201 ± 0.0182<br>(NC)     | 2.0<br>(1.0, 2.0)    | 0.852 ± 0.176<br>(0.839)    | 69.2 ± 15.9<br>(68)   |
| 50 mg BID               | 4 | 0.446 ± 0.132<br>(0.430)  | 0.0845 ± 0.0233<br>(0.0823) | 2.0<br>(1.0, 2.0)    | 2.20 ± 0.302<br>(2.18)      | 52.8 ± 8.18 (52.4)    |
| 75 mg BID               | 4 | 0.572 ± 0.266<br>(0.534)  | 0.0254 ± 0.0202<br>(NC)     | 2.0<br>(2.0, 6.0)    | 2.15 ± 0.679<br>(2.07)      | 85.9 ± 26.0<br>(82.8) |
| 100 mg BID              | 4 | 0.794 ± 0.235<br>(0.771)  | 0.0875 ± 0.0317<br>(0.0834) | 2.0<br>(1.0, 4.0)    | 3.50 ± 0.548<br>(3.46)      | 66.5 ± 10.8 (65.9)    |
| 200 mg BID <sup>a</sup> | 6 | 1.79 ± 0.771<br>(1.53)    | 0.14 ± 0.112<br>(NC)        | 2.0<br>(1.0, 4.0)    | 7.48 ± 2.86<br>(6.76)       | 79.4 ± 61.2 (67.5)    |
| 300 mg BID              | 2 | 3.10, 3.27                | 0.247, 0.954                | 1.0, 2.0             | 9.50, 24.8                  | 72.1, 27.6            |

AUC, area under the curve; BID, twice daily; CL/F, oral clearance; C<sub>max/min</sub>, maximum/minimum concentration; NC, not calculated; PK, pharmacokinetic; T<sub>max</sub>, time to maximum concentration

Values are presented as mean ± SD (geometric mean), except median (min, max) for T<sub>max</sub>.

<sup>a</sup> One patient had only 2 postdose PK concentration data points available and was thus excluded from this PK analysis.
